# Supplementary material for: Prognostic stratification of older patients with multivessel coronary artery disease treated with percutaneous transluminal coronary angioplasty based on clinical and biochemical measures: protocol for a prospective cohort study
Source: PubMed Central journal article supplement — BMJ Open. 2022 Feb 28;12(2):e058042. doi: 10.1136/bmjopen-2021-058042 (PMC8886411; doi:10.1136/bmjopen-2021-058042), 2022-02-28
Supplement: bmjopen-2021-058042.draft_revisions.pdf [file bmjopen-2021-058042.draft_revisions.pdf]

# BMJ Open

BMJ Open is committed to open peer review. As part of this commitment we make the peer review history of every article we publish publicly available.

When an article is published we post the peer reviewers' comments and the authors' responses online. We also post the versions of the paper that were used during peer review. These are the versions that the peer review comments apply to.

The versions of the paper that follow are the versions that were submitted during the peer review process. They are not the versions of record or the final published versions. They should not be cited or distributed as the published version of this manuscript.

BMJ Open is an open access journal and the full, final, typeset and author-corrected version of record of the manuscript is available on our site with no access controls, subscription charges or pay-per-view fees (<http://bmjopen.bmj.com>).

If you have any questions on BMJ Open's open peer review process please email [info.bmjopen@bmj.com](mailto:info.bmjopen@bmj.com)

# BMJ Open

**Prognosis stratification after percutaneous transluminal coronary angioplasty in old patients hospitalized for acute coronary syndrome. Evaluation of inflammatory markers and oxidative stress biomarkers. Design of a prospective cohort study.**

|                               |                                                                                                                                                                                                                                                                                                                                                                                                                                                                                                                                                                                                                                                                                                                                                                                                                                                                                                                                                                                                                                                                                                                                                                                                                                                                                                                                                                                                                                                                                                                                                                                                                                                                                                                                                                                                                                                                                                                                                                                                                                                                                                                                                                                                                                                                                                                                                                                        |
|-------------------------------|----------------------------------------------------------------------------------------------------------------------------------------------------------------------------------------------------------------------------------------------------------------------------------------------------------------------------------------------------------------------------------------------------------------------------------------------------------------------------------------------------------------------------------------------------------------------------------------------------------------------------------------------------------------------------------------------------------------------------------------------------------------------------------------------------------------------------------------------------------------------------------------------------------------------------------------------------------------------------------------------------------------------------------------------------------------------------------------------------------------------------------------------------------------------------------------------------------------------------------------------------------------------------------------------------------------------------------------------------------------------------------------------------------------------------------------------------------------------------------------------------------------------------------------------------------------------------------------------------------------------------------------------------------------------------------------------------------------------------------------------------------------------------------------------------------------------------------------------------------------------------------------------------------------------------------------------------------------------------------------------------------------------------------------------------------------------------------------------------------------------------------------------------------------------------------------------------------------------------------------------------------------------------------------------------------------------------------------------------------------------------------------|
| Journal:                      | <i>BMJ Open</i>                                                                                                                                                                                                                                                                                                                                                                                                                                                                                                                                                                                                                                                                                                                                                                                                                                                                                                                                                                                                                                                                                                                                                                                                                                                                                                                                                                                                                                                                                                                                                                                                                                                                                                                                                                                                                                                                                                                                                                                                                                                                                                                                                                                                                                                                                                                                                                        |
| Manuscript ID                 | bmjopen-2021-058042                                                                                                                                                                                                                                                                                                                                                                                                                                                                                                                                                                                                                                                                                                                                                                                                                                                                                                                                                                                                                                                                                                                                                                                                                                                                                                                                                                                                                                                                                                                                                                                                                                                                                                                                                                                                                                                                                                                                                                                                                                                                                                                                                                                                                                                                                                                                                                    |
| Article Type:                 | Protocol                                                                                                                                                                                                                                                                                                                                                                                                                                                                                                                                                                                                                                                                                                                                                                                                                                                                                                                                                                                                                                                                                                                                                                                                                                                                                                                                                                                                                                                                                                                                                                                                                                                                                                                                                                                                                                                                                                                                                                                                                                                                                                                                                                                                                                                                                                                                                                               |
| Date Submitted by the Author: | 06-Oct-2021                                                                                                                                                                                                                                                                                                                                                                                                                                                                                                                                                                                                                                                                                                                                                                                                                                                                                                                                                                                                                                                                                                                                                                                                                                                                                                                                                                                                                                                                                                                                                                                                                                                                                                                                                                                                                                                                                                                                                                                                                                                                                                                                                                                                                                                                                                                                                                            |
| Complete List of Authors:     | <p>Carmona-Segovia, Ada; Instituto de Investigacion Biomedica de Malaga, Cardiology Department; Hospital Virgen de la Victoria Unidad de Gestion Clinica del Corazon y Patologia Cardiovascular, Cardiología</p> <p>Doncel-Abad, Maria ; Hospital Virgen de la Victoria Unidad de Gestion Clinica del Corazon y Patologia Cardiovascular, Cardiology Department</p> <p>Becerra-Muñoz, Víctor; Hospital Virgen de la Victoria Unidad de Gestion Clinica del Corazon y Patologia Cardiovascular, Cardiology Department</p> <p>Rodríguez-Capitán, Jorge; Hospital Virgen de la Victoria Unidad de Gestion Clinica del Corazon y Patologia Cardiovascular, Cardiology Department;</p> <p>Instituto de Investigación Biomédica de Málaga</p> <p>Sabatel-Pérez, Fernando; Hospital Virgen de la Victoria Unidad de Gestion Clinica del Corazon y Patologia Cardiovascular, Cardiology Department</p> <p>Flores-López, María; Hospital Virgen de la Victoria Unidad de Gestion Clinica del Corazon y Patologia Cardiovascular; Instituto de Investigación Biomédica de Málaga</p> <p>Sánchez-Quintero, María; Hospital Virgen de la Victoria Unidad de Gestion Clinica del Corazon y Patologia Cardiovascular; Instituto de Investigación Biomédica de Málaga</p> <p>Medina-Vera, Dina; Instituto de Investigación Biomédica de Málaga</p> <p>Molina-Ramos, Ana; Hospital Virgen de la Victoria Unidad de Gestion Clinica del Corazon y Patologia Cardiovascular, Cardiology Department; Instituto de Investigación Biomédica de Málaga</p> <p>Angullo-Gómez, María; Hospital Virgen de la Victoria Unidad de Gestion Clinica del Corazon y Patologia Cardiovascular, Cardiology Department</p> <p>García-Rodríguez, Luis; Hospital Virgen de la Victoria Unidad de Gestion Clinica del Corazon y Patologia Cardiovascular, Cardiology Department</p> <p>Palma-Martí, Lucía; Hospital Virgen de la Victoria Unidad de Gestion Clinica del Corazon y Patologia Cardiovascular, Cardiology Department</p> <p>Pavón-Morón, Francisco; Hospital Virgen de la Victoria Unidad de Gestion Clinica del Corazon y Patologia Cardiovascular; Instituto de Investigación Biomédica de Málaga</p> <p>Jiménez-Navarro, Manuel; Hospital Virgen de la Victoria Unidad de Gestion Clinica del Corazon y Patologia Cardiovascular, Cardiology Department; Instituto de Investigación Biomédica de Málaga</p> |

1  
2  
3  
4  
5  
6  
7  
8  
9  
10  
11  
12  
13  
14  
15  
16  
17  
18  
19  
20  
21  
22  
23  
24  
25  
26  
27  
28  
29  
30  
31  
32  
33  
34  
35  
36  
37  
38  
39  
40  
41  
42  
43  
44  
45  
46  
47  
48  
49  
50  
51  
52  
53  
54  
55  
56  
57  
58  
59  
60

|           |                                                                                                                                                                 |
|-----------|-----------------------------------------------------------------------------------------------------------------------------------------------------------------|
| Keywords: | Myocardial infarction < CARDIOLOGY, Ischaemic heart disease < CARDIOLOGY, Adult cardiology < CARDIOLOGY, GERIATRIC MEDICINE, Coronary intervention < CARDIOLOGY |
|           |                                                                                                                                                                 |

SCHOLARONE™  
Manuscripts

1  
2  
3 **PROGNOSIS STRATIFICATION AFTER PERCUTANEOUS TRANSLUMINAL CORONARY**  
4 **ANGIOPLASTY IN OLD PATIENTS HOSPITALIZED FOR ACUTE CORONARY SYNDROME.**  
5 **EVALUATION OF INFLAMMATORY MARKERS AND OXIDATIVE STRESS BIOMARKERS. Design**  
6 **of a prospective cohort study.**  
7

8 **Ongoing research***Ongoing research*  
9

10 Ada DM Carmona-Segovia <sup>1,2</sup>, María V Doncel-Abad <sup>1</sup>, Víctor M Becerra-Muñoz <sup>1,2</sup>, Jorge  
11 Rodríguez-Capitán <sup>1,2</sup>, Fernando Sabatel-Pérez <sup>1</sup>, María Flores-López <sup>1,2</sup>, María J Sánchez-  
12 Quintero <sup>1,2</sup>, Dina Medina-Vera <sup>2</sup>, Ana I Molina-Ramos <sup>1,2</sup>, María Angullo-Gómez <sup>1</sup>, Luis García-  
13 Rodríguez <sup>1</sup>, Lucía Palma-Martí <sup>1</sup>, Francisco J Pavón-Morón <sup>1,2</sup>, Manuel Jiménez-Navarro <sup>1,2</sup>.  
14  
15

16 <sup>1</sup>Unidad de Gestión Clínica del Corazón, Hospital Universitario Virgen de la Victoria, Campus de  
17 Teatinos, S/N, 29010 Málaga, Spain.  
18

19 <sup>2</sup>Instituto de Investigación Biomédica de Málaga- IBIMA 29071 Málaga, Spain.  
20

21 Correspondence to: Dr Jiménez Navarro [mjimeneznavarro@uma.es](mailto:mjimeneznavarro@uma.es). Hospital Universitario  
22 Virgen de la Victoria. Campus de Teatinos, S/N, 29010 Málaga.  
23

24 **Keywords:** Older patients, Myocardial infarction, Acute Coronary Syndrome, Percutaneous  
25 Transluminal Coronary Angioplasty, Revascularization, Gender, Frailty.  
26

27 **ABSTRACT**  
28

29 **Introduction:** Ischaemic heart disease is the main cause of death globally. It is responsible for  
30 16% of the world's total deaths, and caused 8,9 million in 2019. Incidence in Acute Coronary  
31 Syndrome is increasing over time such as the life expectancy. An increased age in patients with  
32 coronary artery disease has been related with in-hospital mortality and it is increasing in a  
33 short period of time. In older patients who suffer an acute coronary syndrome there is no  
34 consensus in the revascularization strategy, depending on the prognosis. As differences in  
35 prognosis have not been accurately described yet. Although the population is turning older in  
36 last decades however older patients are usually excluded from the majority of clinical trials.  
37

38 **Methods and analysis:** Observational, longitudinal, prospective study that will include a total  
39 of 150 patients attended at the Cardiology and Cardiovascular Surgery Department. Patients  
40 will be recruited during the first year of the study. The primary exposure variable will be the  
41 revascularization strategy (complete or incomplete). The primary outcome will be a  
42 combination of: cardiovascular death, re-infarction, re-hospitalization due to cardiac  
43 insufficiency and stroke. **Ethics and dissemination:** This study was approved by the Málaga  
44 Provincial Research Ethics Committee and the Hospital's Committee. With the reference  
45 number PI 0131/2020. Previous information will be given to the patients prior signing the  
46 written informed consent for collecting any data. **Conclusions:** This observational study  
47 pretends to create predictive models to determine the appropriate revascularization type for  
48 ischaemic heart disease in aged patients who require therapeutic intervention.  
49  
50  
51  
52  
53  
54  
55  
56  
57  
58  
59  
60

**ARTICLE SUMMARY****STRENGTHS AND LIMITATIONS OF THIS STUDY**

Providing evidence in a lack of knowledge in the management of the Acute Coronary Syndrome in older patients.

This prospective study will allow patients to be followed over time, and developing a predictive model of long-term prognosis layering depending on a complete vs incomplete revascularization in older patients with acute coronary syndrome.

It is an observational research, we cannot establish causality relations, only association between known and computed factors/ outcomes.

Participants will be recruited from a single centre.

Data and participants may be missed on recruitment or follow-up assessment.

**LIST ABBREVIATIONS**

ACS: Acute Coronary Syndrome

CAD: Coronary Artery Disease

CR: Complete Revascularization

CRP: C-reactive protein

CRUSADE: Can Rapid risk stratification of Unstable Angina patients Suppress Adverse outcomes with early implementation of the ACC/AHA guidelines

EKG: Electrocardiogram

GRACE: Global Registry of Acute Coronary Events

ICR: Incomplete Revascularization

LBBB: Left Bundle Branch Block

MACE: Major Adverse Cardiac Event

MVD: Multivessel Disease

NSTE-ACS: Non ST- Segment elevation acute coronary syndrome

PCI: Percutaneous Coronary Intervention

PTCA: Percutaneous Transluminal Coronary Angioplasty

STE-ACS: ST- Segment elevation acute coronary syndrome

STEMI: ST- Segment elevation acute myocardial infarction

## INTRODUCTION

Ischaemic heart disease is the main cause of death globally. It is responsible for 16% of the world's total deaths, and caused 8,9 million of deaths in 2019. (1) An increased age in patients with coronary artery disease has been related with hospital mortality in a short period of time. (2) The 14,52 % of population in Spain is >70 years old, and it is estimated that 27,4% of patients with ischaemic heart diseases are between 70 and 80 years old. (3)

Patients with ischaemic heart disease usually present a multi-vessel CAD (Coronary Artery Disease), and they will be classified by the revascularization strategy into two groups: complete or incomplete percutaneous transluminal coronary angioplasty (PTCA). Complete revascularization (CR) can be defined as the revascularization of all the coronary artery lesions with  $\geq 1.5$  mm diameter and  $\geq 70$  % stenosis. As previously described, incomplete revascularization (ICR) will be defined as the revascularization of at least one coronary artery lesion, with  $\geq 1,5$  mm and  $\geq 70\%$  stenosis when there exists a multivessel disease, leaving any untreated lesion. (4)

In patients with MVD (Multivessel Disease), some studies have shown mild rates of death, MACE (Major Adverse Cardiac Event) and repeated revascularization in patients with CR in comparison with ICR. Patients with MVD (Multivessel Disease) and ST elevation who underwent primary PCI (Percutaneous Coronary Intervention) had more MACE and death than patients with single-vessel disease and STEMI (ST- Segment elevation acute myocardial infarction). (4) Moreover, the anatomical location of the coronary lesion is also prognostic of clinical outcome. ( 5)

It has been shown that coronary artery disease's severity, ischaemia grade and acute hemodynamic deterioration are treatable risks. While prior myocardial damage, ageing, chronic kidney dysfunction and other comorbidities are not treatable risks. There exist considerable differences between patients older than 70 years old hospitalized with (NSTEMI-ACS, STEMI-ACS) and general population. (6) Older patients with coronary artery disease usually show differences compared to younger patients; with a higher rate of all cause-mortality, stroke, myocardial infarction, bleeding and unplanned revascularization, less chest pain, more dyspnoea, nausea and syncope. Thereby, the treatment should not be the same in different age groups, and the practitioner must value the risk-benefit for using any procedure. (7)

Geriatric syndrome includes frailty, comorbidity and disability. ( 8 ) The accumulation of molecular and cellular damages due to regulation mechanisms, causes ageing. Frailty is characterized by vulnerability to the adaptation of homeostasis after a stress event. It is as well associated with adverse health outcomes, which relates with prognosis and vulnerability in older patients. Frailty is the most common cause of death in aged patients (27,9%), and it is related with hospitalization, falls, care home admission, and mortality. It has although an influence in the clinical evolution in older patients, and it is an important factor for evaluating and analysing treatment strategies. (8, 9) Furthermore, older patients are usually excluded from the majority of randomized clinical trials, which make the basis of clinical guidelines.

Inflammatory and oxidative systemic states are common in metabolic, cardiovascular and neurodegenerative diseases, increasing in older patients. (10) Some pro-inflammatory markers as cytokines TNF- $\alpha$  or IL-1 $\beta$ , which are responsible of the expression of the CRP (C-reactive protein) and the production of cortisol, show sex differences. Pro-inflammatory markers in cardiovascular diseases, can predict some outcomes in women. Especially when menopause occurs, associated with hormonal changes. (11, 12)

1  
2  
3 Previous studies have established a prognosis stratification in ischaemic heart disease for  
4 percutaneous transluminal coronary angioplasty (PTCA). A systematic review about it in  
5 multivessel coronary artery disease, showed that the CR was associated with less mortality risk  
6 and MACE. (13) Other study showed that in old patients with NSTEMI-ACS who underwent a  
7 revascularization during the hospitalization, it has been shown a relation with less mortality in  
8 one year. Although, if the patient has comorbidities, the benefit is not that big. (14)  
9

10  
11 These studies usually have specific samples, and do not include patients older than 70 years  
12 because of added health complications. So there exists a lack in the evidence knowledge in  
13 older patients. (15) The present project is focused in the elderly, who require a higher  
14 assistance because of a higher life expectancy, also having high cardiovascular diseases  
15 prevalence.  
16

17  
18 The aim of this study is to establish a cardiovascular prognosis stratification in old patients with  
19 acute coronary syndrome and multivessel disease. This prognosis stratification would integrate  
20 inflammatory and oxidative stress markers with clinical, angiographic and metabolic variables  
21 in elderly patients taking account of gender differences, and a precision medicine. It will have a  
22 direct impact on quality of life in these patients.  
23

24  
25 Given that it is difficult to establish a generalization, there exist many limitations in a  
26 randomized controlled trial when comparing the outcomes of CR and ICR, specially concerning  
27 ethical issues. However, there is no consensus in deciding a method, due to a lack of clinical  
28 trials addressing this topic. Ethical considerations in randomizing patients into one or another  
29 treatment strategy has been a concerning issue. For this reason, an observational focus may be  
30 of interest to determine whether the prognosis can be different in older patients.  
31  
32

## 33 34 **METHODS AND ANALYSIS**

### 35 36 **Patient and public involvement**

37  
38 Patients or the public were not involved in the design, or conduct, or reporting, or  
39 dissemination plans of our research.  
40

### 41 42 **Participants**

43  
44 In this longitudinal cohort study, will be recruited older participants who assist Virgen de la  
45 Victoria's Hospital because of an ischemic heart disease and who will undergo a coronary  
46 revascularization. Inclusion criteria will be: men and women  $\geq 70$  years old. Hospitalized  
47 because of an acute coronary syndrome (NSTEMI-ACS, STEMI-ACS) with multivessel disease (severe  
48 stenosis  $>70\%$  in  $\geq 2$  coronary arteries over 2.5 mm diameter) who underwent PCI. (14)  
49 Patients must accept and sign the informed consent.  
50

51  
52 Exclusion criteria: Life expectancy under 1 year, not signing the informed consent, not having a  
53 legal representative if needed, not being able to complete any questionnaire, not having a  
54 fixed place of living, or not being able to go to the 6 month's monitoring.  
55

### 56 57 **Study Outcomes**

58  
59 The primary aim of the study is to establish a prognosis layering in older patients ( $\geq 70$  years  
60 old) with ischaemic heart disease. Evaluating differences in prognosis according to clinical  
characteristics as sex, previous comorbidities and frailty as well as treatment strategies

(complete or incomplete coronary revascularization). As a secondary outcome, we will evaluate the patient's inflammatory status and the clinical, angiographic and metabolic variables that seem sensitive and specific for the evolution after the initial therapeutic approach and the monitoring. A key factor to be analysed will be the decision of a complete versus an incomplete revascularization, which is the primary exposure variable.

## STUDY DESIGN AND EVOLUTION

This observational, longitudinal, and prospective study is taking the entry phase in the first year of the study. The first patient was included in June 2021. It is expected to end the inclusion period by March 2022. The 6 month follow-up is expected to end in September 2022.

### Primary outcome

Patients attending the Cardiology and Cardiovascular Surgery Service in the Virgen de la Victoria University Hospital and who meet the criteria will be invited to participate. Patients will be followed for 18 months.

The follow-up information will be obtained at the visit 6 months after the selection. A blood sample will be collected, also will have some life habits, dependence, and life related questionnaires to answer and an EKG. Also, any problem related to health during the 6 months, will be recorded.

### Study Variables

Demographic, clinical and angiographic variables will be recorded.

Baseline demographic and anthropometric variables. We take into account: gender, weight and height, BMI, educational level, cohabitation, smoking situation.

Clinical and angiographic variables include comorbidities such as arterial hypertension, dyslipidaemia or diabetes.

Also include others like presentation (NSTEMI-ACS, STEMI-ACS), ventricular ejection fraction, coronagraph result with classic classification, Syntax Score for evaluating the complexity of coronary artery lesions, medical treatment at hospital and at home and revascularization type, number of lesions, tortuosity, bifurcation, long, diffuse

Inflammatory biochemistry and Oxidative stress variables

We will study some parameters such as ELISAs: Cytokine proinflammatory (IL-6, IL-1 $\beta$  y TNF- $\alpha$ ), chemokines CX3CL1/fractalkine, C - reactive protein (CRP); and oxidative stress markers as glutathione concentration (GSH), oxidized glutathione (GSSG), total glutathione (GT) and Malondialdehyde (MDA).

Also we will record parameters such as creatinine clearance, troponins or ACE.

### Statistical Analysis

Continuous variables will be studied with mean +/- SD, categorical ones as proportions.



1  
2  
3 Descriptive and exploratory analysis will study measures of central tendency and dispersion or  
4 percentages. For evaluating the normal distribution, it will be used kurtosis, asymmetry and  
5 Kolmogorov-Smirnov test. In normally-distributed variables, Chi square test will be used for  
6 bivariate analysis, and for bivariate analysis in continuous variables for independent samples, it  
7 will be performed using Student's t test. In case, the distribution is not normal, it will be used  
8 Mann-Whitney U test and Wilcoxon test as non-parametric tests. For multivariate analysis,  
9

10  
11 ANOVA will be used for determining relations between quantitative and qualitative variables,  
12 with central robustness analysis if there is no homoscedasticity (proved by Levene test). For all  
13 parameters, the precisions will be estimated with confidence intervals at 95%. Statistical  
14 analysis will be performed using SPSS 24.  
15

### 16 **Sample Size Calculation**

17  
18 We estimated a total of 150 patients for the study. The calculation assumes 5 alpha and 20  
19 beta errors respectively.  
20

### 21 **Database recording**

22  
23 Data will be recorded and analyzed using SPSS 25. Personal data will be anonymized  
24

25 Data from the health digitized history, interview and questionnaires will be recorded by a  
26 nurse and physicians. Data from the PTCA, as the syntax score or the injury characteristics will  
27 be filled in by two hemodynamicist, and if needed, there will be a third one.  
28

### 29 **Clinical questionnaires**

30  
31 Patients will fill several questionnaires in the basal and the monitoring follow-up as Frail  
32 (frailty), Charlson Index (comorbidity), dependence (Barthel Index), Instrumental disability  
33 (Lawton-Brody scale), alcohol consumption (Audit test), cognitive decline (Pfeiffer Scale) and  
34 Quality of Life related to health (SF-36). GRACE (Global Registry of Acute Coronary Events) and  
35 CRUSADE bleeding score (Can Rapid risk stratification of Unstable angina patients Suppress  
36 Adverse outcomes with Early implementation of the ACC/AHA guidelines).  
37  
38

### 39 **Blood samples**

40  
41 Blood samples will be collected by venepuncture using 2 tubes of 10 ml of blood, BD  
42 Vacutainer with K2 EDTA by a nurse. Each blood drawn will be centrifuged in 2200 x G 4 °C  
43 during 15 minutes to obtain plasma. Samples will be stored at -80°C for further analysis.  
44

### 45 **ETHICS AND DISSEMINATION**

46  
47 The present study was authorized by the Málaga Provincial Research Ethics Committee and the  
48 Hospital's Committee. Patients must have received previous information and written,  
49 informed consent to participate will be obtained from all participants. All data will be stored  
50 segregated and will be anonymized. The study will be conducted in accordance with the  
51 Declaration of Helsinki and its ethical principles for research. All data will be treated respecting  
52 the Organic Law 3/2018: Personal Data Protection, and the Law 41/2002 of 14 November:  
53 Patient Autonomy and Rights and Obligations of Information and Clinical Documentation.  
54  
55  
56  
57  
58  
59  
60

**REFERENCES**

1. World Health Organization. WHO Global Health Estimates. Leading causes of death and disability 2000-2019. [Internet]. [Updated 2020 dec ; cited 2021 Aug 7] Available from: .  
<https://www.who.int/data/global-health-estimates>.
2. Krumholz HM. Cardiopatía isquémica en el anciano. Conferencia Especial del XXXVI Congreso Nacional de la Sociedad Española de Cardiología. Rev Esp Cardiol. 2001; 54(7): 819-826.
3. Instituto Nacional de Estadística. Madrid: 2020. [Updated 2020 Jan 1; cited 2021 Jun 9] Available from:  
[https://www.ine.es/dyngs/INEbase/es/categoria.htm?c=Estadistica\\_P&cid=1254734710984](https://www.ine.es/dyngs/INEbase/es/categoria.htm?c=Estadistica_P&cid=1254734710984)
4. Gaba P, Gersh BJ, Ali ZA, Moses JW, Stone GW. Complete versus incomplete coronary revascularization: definitions, assessment and outcomes. Nat Rev Cardiol. 2020; 18 (3): 155-168.
5. Maddox TM, Stanislawski MA, Grunwald GK, Bradley AM, Ho PM, Tsai TT, et al. Non obstructive coronary artery disease and risk of myocardial infarction. JAMA. 2014; 312 (17): 1754-63.
6. Savonitto S , Morici N, De Servi S. El tratamiento de síndromes coronarios agudos de ancianos y pacientes con comorbilidades. Rev Esp Cardiol. 2014; 67(7): 564-73.
7. Engberding N, Wenger N. Acute Coronary Syndromes in the Elderly. Journal List. 2017; 6: 1791.
8. A. Clegg, J. Young, S. Iliff, M. Olde Rikkert, K. Rockwood. Frailty in elderly people. Lancet. 2013; 381:752-762.
9. Inouye S, Studenski S, Tinetti M, Kuchel G. Geriatric Syndromes: Clinical, Research and Policy Implications of a Core Geriatric Concept. J Am Geriatr Soc. 2007; 55(5): 780-791.
10. Steven S, Frenis K, Oelze M, Kalinovic S, Kuntic M, Bayo MT. Vascular Inflammation and Oxidative Stress: Major Triggers for Cardiovascular Disease. Oxid Med Cell Longev. 2019.
11. Ridker P, Cannon C, Morrow D, Rifai N et al. C-Reactive Protein Levels and Outcomes after Statin Therapy. N Engl J Med. 2005; 352(1):20-28.
12. Mattina G, Van Lieshout R, Steiner M. Inflammation, depression and cardiovascular disease in women: the role of the immune system across critical reproductive events. Ther Adv Cardiovasc Dis. 2019; 13 (4).
13. Nagaraja V, Ooi SY, Nolan J, Large A, De Belder M, Ludman P et al. Impact of Incomplete Percutaneous Revascularization in Patients With Multivessel Coronary Artery Disease: A Systematic Review and Meta-analysis. J Am Heart Assoc. 2016; 5 (12).
14. Sanchis J, García-Acuña JM, Raposeiras S, Barrabés JA, Cordero A, Martínez-Sellés M et al. Comorbidity burden and revascularization Benefit in elderly patients with acute coronary syndrome. Rev Esp Cardiol. 2021. 74 (9); 765-72.
15. Cui K, Lyu S, Song X, Liu H, Yuan F, Xu Feng et al. Long-term Safety and Efficacy of Staged Percutaneous Coronary Intervention for Patients with ST-Segment Elevation Myocardial Infarction and Multivessel Coronary Disease. J Am Coll Cardiol. 2019; 124 (3): 334-42.

## FUNDING STATEMENT

This research was funded by the Servicio Andaluz de Salud, grant number PI 0131/2020 and supported by Consejería Salud Junta de Andalucía. This work was also supported by the Fundación Andaluza de Cardiología. The main research group belongs to CIBERCV “Enfermedades Cardiovasculares” (CB16/11/00360) of the “Instituto de Salud Carlos III”. It received a grant from the Spanish Ministry of Health, co-founded by Fondo Europeo de Desarrollo Regional (FEDER).

## CONFLICTS OF INTEREST

The authors declare that they have no competing interests.

## Clinical implications

The aim of the present study is to make a prognosis layering in elderly patients presenting with ischaemic heart disease. Our goal is to create a useful tool to guide and support clinicians in surgical acting, avoiding important risks and complications that could be secondary to complete vs incomplete revascularization.

## AUTHOR STATEMENT

M.J.-N, F.J.P.-M and J.R.-C. conceived the original idea. A.D.M.C-S and M.J.-N wrote the paper with input from all authors. M.J.-N, A.D.M.C-S, M.V.D.-A, V.M.B.-M, F.J.P.-M, J.R.-C, F.S.-P, M.J.S.-Q, M.F.-L, D.M.-V, A.I.M.-R, A.G.-M, L.G.-R and L.P.-M are contributing to the development of the research. All authors have read and agreed to the published version of the manuscript.

## ACKNOWLEDGMENTS

This article received funding support for the statistical analysis from Malaga University's Cátedra de Terapias Avanzadas en Patología Cardiovascular (Chair of Advanced Therapies in Cardiovascular Pathologies. CIF Q-2918001-E). We thank José Herrera Jiménez because his help in clinical analysis.

**Word count:** 2200 words

# BMJ Open

## Prognostic stratification of older patients with multivessel coronary artery disease treated with percutaneous transluminal coronary angioplasty based on clinical and biochemical measures: Protocol for a prospective cohort study

|                               |                                                                                                                                                                                                                                                                                                                                                                                                                                                                                                                                                                                                                                                                                                                                                                                                                                                                                                                                                                                                                                                                                                                                                                                                                                                                                                                                                                                                                                                                                                                                                                                                                                                                                                                                                                                                                                                                                                                                                                                                                                                                                                                                                                                                                                                                                                                                                                                                                                                                              |
|-------------------------------|------------------------------------------------------------------------------------------------------------------------------------------------------------------------------------------------------------------------------------------------------------------------------------------------------------------------------------------------------------------------------------------------------------------------------------------------------------------------------------------------------------------------------------------------------------------------------------------------------------------------------------------------------------------------------------------------------------------------------------------------------------------------------------------------------------------------------------------------------------------------------------------------------------------------------------------------------------------------------------------------------------------------------------------------------------------------------------------------------------------------------------------------------------------------------------------------------------------------------------------------------------------------------------------------------------------------------------------------------------------------------------------------------------------------------------------------------------------------------------------------------------------------------------------------------------------------------------------------------------------------------------------------------------------------------------------------------------------------------------------------------------------------------------------------------------------------------------------------------------------------------------------------------------------------------------------------------------------------------------------------------------------------------------------------------------------------------------------------------------------------------------------------------------------------------------------------------------------------------------------------------------------------------------------------------------------------------------------------------------------------------------------------------------------------------------------------------------------------------|
| Journal:                      | <i>BMJ Open</i>                                                                                                                                                                                                                                                                                                                                                                                                                                                                                                                                                                                                                                                                                                                                                                                                                                                                                                                                                                                                                                                                                                                                                                                                                                                                                                                                                                                                                                                                                                                                                                                                                                                                                                                                                                                                                                                                                                                                                                                                                                                                                                                                                                                                                                                                                                                                                                                                                                                              |
| Manuscript ID                 | bmjopen-2021-058042.R1                                                                                                                                                                                                                                                                                                                                                                                                                                                                                                                                                                                                                                                                                                                                                                                                                                                                                                                                                                                                                                                                                                                                                                                                                                                                                                                                                                                                                                                                                                                                                                                                                                                                                                                                                                                                                                                                                                                                                                                                                                                                                                                                                                                                                                                                                                                                                                                                                                                       |
| Article Type:                 | Protocol                                                                                                                                                                                                                                                                                                                                                                                                                                                                                                                                                                                                                                                                                                                                                                                                                                                                                                                                                                                                                                                                                                                                                                                                                                                                                                                                                                                                                                                                                                                                                                                                                                                                                                                                                                                                                                                                                                                                                                                                                                                                                                                                                                                                                                                                                                                                                                                                                                                                     |
| Date Submitted by the Author: | 24-Jan-2022                                                                                                                                                                                                                                                                                                                                                                                                                                                                                                                                                                                                                                                                                                                                                                                                                                                                                                                                                                                                                                                                                                                                                                                                                                                                                                                                                                                                                                                                                                                                                                                                                                                                                                                                                                                                                                                                                                                                                                                                                                                                                                                                                                                                                                                                                                                                                                                                                                                                  |
| Complete List of Authors:     | <p>Carmona-Segovia, Ada; Instituto de Investigacion Biomedica de Malaga, Cardiology Department; Hospital Virgen de la Victoria Unidad de Gestion Clinica del Corazon y Patologia Cardiovascular, Cardiología</p> <p>Doncel-Abad, Maria ; Hospital Virgen de la Victoria Unidad de Gestion Clinica del Corazon y Patologia Cardiovascular, Cardiology Department</p> <p>Becerra-Muñoz, Víctor; Hospital Virgen de la Victoria Unidad de Gestion Clinica del Corazon y Patologia Cardiovascular, Cardiology Department;</p> <p>Instituto de Investigación Biomédica de Málaga</p> <p>Rodríguez-Capitán, Jorge; Hospital Virgen de la Victoria Unidad de Gestion Clinica del Corazon y Patologia Cardiovascular, Cardiology Department;</p> <p>Instituto de Investigación Biomédica de Málaga</p> <p>Sabatel-Pérez, Fernando; Hospital Virgen de la Victoria Unidad de Gestion Clinica del Corazon y Patologia Cardiovascular, Cardiology Department</p> <p>Flores-López, María; Hospital Virgen de la Victoria Unidad de Gestion Clinica del Corazon y Patologia Cardiovascular; Instituto de Investigación Biomédica de Málaga</p> <p>Sánchez-Quintero, María; Hospital Virgen de la Victoria Unidad de Gestion Clinica del Corazon y Patologia Cardiovascular; Instituto de Investigación Biomédica de Málaga</p> <p>Medina-Vera, Dina; Instituto de Investigación Biomédica de Málaga</p> <p>Molina-Ramos, Ana; Hospital Virgen de la Victoria Unidad de Gestion Clinica del Corazon y Patologia Cardiovascular, Cardiology Department;</p> <p>Instituto de Investigación Biomédica de Málaga</p> <p>El Bekay, Rajaa; Instituto de Investigacion Biomedica de Malaga</p> <p>Miguel Morales-Asencio, Jose; Universidad de Málaga Facultad de Ciencias de la Salud, Enfermería; Instituto de Investigación Biomédica de Málaga</p> <p>Angullo-Gómez, María; Hospital Virgen de la Victoria Unidad de Gestion Clinica del Corazon y Patologia Cardiovascular, Cardiology Department</p> <p>García-Rodríguez, Luis; Hospital Virgen de la Victoria Unidad de Gestion Clinica del Corazon y Patologia Cardiovascular, Cardiology Department</p> <p>Palma-Martí, Lucía; Hospital Virgen de la Victoria Unidad de Gestion Clinica del Corazon y Patologia Cardiovascular, Cardiology Department</p> <p>Pavón-Morón, Francisco; Hospital Virgen de la Victoria Unidad de Gestion Clinica del Corazon y Patologia Cardiovascular; Instituto de Investigación Biomédica de Málaga</p> |

1  
2  
3  
4  
5  
6  
7  
8  
9  
10  
11  
12  
13  
14  
15  
16  
17  
18  
19  
20  
21  
22  
23  
24  
25  
26  
27  
28  
29  
30  
31  
32  
33  
34  
35  
36  
37  
38  
39  
40  
41  
42  
43  
44  
45  
46  
47  
48  
49  
50  
51  
52  
53  
54  
55  
56  
57  
58  
59  
60

|                                                    |                                                                                                                                                                                                 |
|----------------------------------------------------|-------------------------------------------------------------------------------------------------------------------------------------------------------------------------------------------------|
|                                                    | Jiménez-Navarro, Manuel; Hospital Virgen de la Victoria Unidad de Gestion Clinica del Corazon y Patologia Cardiovascular, Cardiology Department; Instituto de Investigación Biomédica de Málaga |
| <b>&lt;b&gt;Primary Subject Heading&lt;/b&gt;:</b> | Cardiovascular medicine                                                                                                                                                                         |
| <b>Secondary Subject Heading:</b>                  | Cardiovascular medicine, Geriatric medicine                                                                                                                                                     |
| <b>Keywords:</b>                                   | Myocardial infarction < CARDIOLOGY, Ischaemic heart disease < CARDIOLOGY, Adult cardiology < CARDIOLOGY, GERIATRIC MEDICINE, Coronary intervention < CARDIOLOGY                                 |
|                                                    |                                                                                                                                                                                                 |

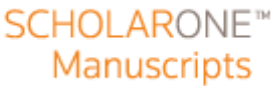

## Protocol

### **Prognostic stratification of older patients with multivessel coronary artery disease treated with percutaneous transluminal coronary angioplasty based on clinical and biochemical measures: Protocol for a prospective cohort study**

Ada DM Carmona-Segovia <sup>1,2</sup>, María V Doncel-Abad <sup>2</sup>, Víctor M Becerra-Muñoz <sup>1,2,3</sup>, Jorge Rodríguez-Capitán <sup>1,2,3</sup>, Fernando Sabatel-Pérez <sup>2</sup>, María Flores-López <sup>1,4</sup>, María J Sánchez-Quintero <sup>1,2,3</sup>, Dina Medina-Vera <sup>1,2,4</sup>, Ana I Molina-Ramos <sup>1,2</sup>, Rajaa El Bekay <sup>1,5,6</sup>, José M Morales-Asencio<sup>1,7</sup>, María Angullo-Gómez <sup>2</sup>, Luis García-Rodríguez <sup>2</sup>, Lucía Palma-Martí <sup>2</sup>, Francisco J Pavón-Morón <sup>1,2,3,4,†</sup>, Manuel Jiménez-Navarro <sup>1,2,3,†</sup>.

<sup>1</sup>Instituto de Investigación Biomédica de Málaga (IBIMA), Málaga, Spain.

<sup>2</sup>Unidad de Gestión Clínica Área del Corazón, Hospital Universitario Virgen de la Victoria, Málaga, Spain.

<sup>3</sup>Centro de Investigación en Red de Enfermedades Cardiovasculares (CIBERCV), Instituto de Salud Carlos III, Madrid, Spain.

<sup>4</sup>Unidad de Gestión Clínica Salud Mental, Hospital Regional Universitario de Málaga, Málaga, Spain.

<sup>5</sup>Unidad de Gestión Clínica de Endocrinología y Nutrición, Hospital Regional Universitario de Málaga, Málaga, Spain.

<sup>6</sup>Centro de Investigación en Red de la Fisiopatología de la Obesidad y Nutrición (CIBEROBN), Instituto de Salud Carlos III, Madrid, Spain.

<sup>7</sup>Departamento de Enfermería, Facultad de Ciencias de la Salud, Universidad de Málaga, Málaga, Spain.

†Correspondence to: Dr Francisco J Pavón-Morón and Dr Manuel Jiménez-Navarro; [javier.pavon@ibima.eu](mailto:javier.pavon@ibima.eu) and [mjimeneznavarro@uma.es](mailto:mjimeneznavarro@uma.es).

## ABSTRACT

**Introduction:** The incidence of acute coronary syndrome is rising in step with the growth of life expectancy. An increase in the age of patients with coronary artery disease has been related to in-hospital mortality, which has seen an upsurge over a short period of time. However, there is no consensus about the percutaneous coronary angioplasty strategy to follow for older patients with multivessel coronary artery disease (MVCAD). Complete (CR) or incomplete (ICR) revascularization strategy depends on prognosis but this has not yet been accurately described because of geriatric conditions and comorbidities. The aim of this study is to evaluate changes of clinical and biochemical parameters in older patients with MVCAD undergoing revascularization and to establish a prognostic stratification model for CR and ICR.

**Methods and analysis:** This observational, longitudinal, prospective study will include 150 patients with MVCAD and subsequent revascularization who attend the Hospital Universitario Virgen de la Victoria (Málaga, Spain). Because of the dropout rates, 180 patients will be recruited at the beginning. Sociodemographic characteristics, clinical and angiographic parameters, and biochemical variables, such as cardiovascular, metabolic, inflammatory, stress oxidative biomarkers, will be collected in the admission for coronary revascularization and three follow-ups at 6, 12 and 18 months. Statistical analyses will be conducted with these data using CR and ICR as the primary exposure variable. Relevant explanatory variables will be selected from a predictive model for their inclusion in a prognostic stratification model. The primary outcome measures will be major adverse cardiovascular events.

**Ethics and dissemination:** Protocols and patient information have been approved by the regional research ethics committee (CEIm Provincial de Málaga-PEIBA (PI0131/2020)). The results will be disseminated in international peer-reviewed journals,

1  
2  
3 presented at conferences in Cardiology and Gerontology, and sent to participants,  
4  
5 medical and health service managers, clinicians and other researchers.  
6  
7

8 **KEYWORDS:** Aging, Acute Coronary Syndrome, Ischemia, Multivessel Coronary  
9  
10 Artery Disease, Revascularization, Geriatric Syndromes, Inflammation, Oxidative  
11  
12 Stress.  
13  
14

15  
16 **Word count:** 2,556  
17  
18  
19  
20  
21  
22  
23  
24  
25  
26  
27  
28  
29  
30  
31  
32  
33  
34  
35  
36  
37  
38  
39  
40  
41  
42  
43  
44  
45  
46  
47  
48  
49  
50  
51  
52  
53  
54  
55  
56  
57  
58  
59  
60

For peer review only



## STRENGTHS AND LIMITATIONS OF THIS STUDY

- This study will collect a comprehensive range of clinical and biochemical data from older patients with multivessel coronary artery disease treated with percutaneous coronary angioplasty to compare complete and incomplete revascularization strategies.
- Because this prospective study will allow follow-up patients over time, relevant explanatory data will be analyzed to develop predictive models for both revascularization strategies with the objective of establishing a prognostic stratification.
- Causality cannot be established between outcomes because this is an observational research and we will be unable to control for all confounding factors, only associations between outcomes will be explored.
- All participants will be recruited from a single center, which affects the sample size and restricts the extrapolation of results to other populations, but the decision making of the clinicians for complete or incomplete revascularizations will be more uniform than in a multicenter-study.
- The COVID-19 pandemic and the health system saturation risk may produce high rates of delay and loss of follow-up in the study because older population are more likely to develop severe illness by SARS-CoV-2.

## INTRODUCTION

Ischemic heart disease is the main cause of death globally. It is responsible for 16% of the world's total mortality and caused 8.9 million deaths in 2019.<sup>1</sup> The progressive increase of age of patients with coronary artery disease, such as angina, myocardial infarction and cardiac arrest, has been related to in-hospital mortality over a short period of time. In Spain, 14.2 percent of the population is  $\geq 70$  years old, and it is estimated that 27.4 percent of patients with ischemic heart diseases are between 70 and 80 years of age.<sup>2</sup>

Despite their demographic importance, older adults are usually excluded or underrepresented in most clinical trials and large studies of cardiovascular diseases because of the high prevalence of comorbidities (e.g., psychiatric disorders, metabolic diseases such as diabetes mellitus, cancer and chronic inflammatory diseases) and the presence of geriatric syndromes (e.g., frailty, falls, pressure ulcers, cognitive impairment, delirium, mood disorders, polypharmacy, and urinary incontinence), which are related to a worse quality of life with high rates of hospitalization, disability and mortality.<sup>3-5</sup> Furthermore, several lines of evidence demonstrate that dysregulation of the regulation of energy metabolism occur during aging and contribute to low-grade inflammation and oxidative stress.<sup>6-7</sup> This systemic dysregulation in major molecular processes has adverse effects on the structure and function of the cardiovascular system, among others.<sup>7-8</sup> Therefore, the scientific evidence for this group of the population is quite limited and the current management in clinical practice is usually carried out on the basis of studies in younger patients and the experience of the doctors, which causes a great variability in the prognosis and therapeutic approaches of ischemic heart diseases.

There are considerable differences between older patients hospitalized for acute coronary syndrome [ST and non-ST segment elevation acute coronary syndromes

1  
2  
3 (STE-ACS and NSTEMI-ACS)] and the general population. Thus, older patients with  
4 ischemic heart diseases present particular clinical and electrocardiographic  
5 characteristics that affect their prognosis relative to younger patients. Specifically, there  
6 is higher rate of all cause-mortality, stroke, myocardial infarction, bleeding and  
7 unscheduled revascularization, atypical symptoms (e.g., lower percentage of chest  
8 pain and more dyspnea), syncope, vegetative alterations (e.g., arterial hypotension and  
9 sweating), nausea and/or confusion.<sup>9-10</sup> Regarding electrocardiographic manifestations,  
10 older patients show high prevalence of repolarization disorders, left ventricular  
11 hypertrophy, left bundle branch block (LBBB) and atrial fibrillation.<sup>9 11-12</sup>  
12  
13  
14  
15  
16  
17  
18  
19  
20  
21  
22

23 An important point is that older adults with ischemic heart disease usually present  
24 multivessel coronary artery disease (MVCAD), which makes treatment difficult because  
25 of the complex coronary anatomy and differences in the severity and extension of the  
26 coronary artery disease in these vessels.<sup>13-14</sup> In fact, patients with MVCAD show major  
27 adverse cardiac events (MACE) such as heart failure, reinfarction, stroke,  
28 hospitalization for cardiovascular-related illness, unscheduled revascularization and all-  
29 cause death and mortality. A critical step is to decide the most appropriate strategy for  
30 revascularization through percutaneous transluminal coronary angioplasty (PTCA).  
31 While a complete revascularization (CR) treats all hemodynamically significant  
32 coronary artery lesions, an incomplete revascularization (ICR) treats the culprit-lesion-  
33 only when MVCAD exists, leaving any untreated lesion.<sup>13 15-16</sup> However, the main  
34 limitation is the lack of uniformity in the definition of both revascularization strategies  
35 because there is no consensus on relevant angiographic criteria related to the  
36 functional and anatomical relevance of the coronary lesions [e.g., coronary segment  
37 diameter ( $\geq 1.5$  mm to  $\geq 2.5$  mm), diameter stenosis ( $\geq 50\%$  to  $\geq 70\%$ )].<sup>17</sup> There is greater  
38 evidence that CR is associated with reduced risk of mortality and MACE, and this  
39 magnitude of risk relates to degree of CR.<sup>18</sup> In contrast, these observations with CR are  
40 much more limited in older patients because comorbidities progressively reduce the  
41  
42  
43  
44  
45  
46  
47  
48  
49  
50  
51  
52  
53  
54  
55  
56  
57  
58  
59  
60

1  
2  
3 revascularization benefit.<sup>19-20</sup> Because of the lack of consensus on angiographic criteria  
4 and clinical guidelines for the coronary revascularization strategy in older patients, the  
5 decision-making is complex, variable and open to considerable influence from human  
6  
7 factors.<sup>13 21</sup>  
8  
9

10  
11  
12 Several determining factors may participate in the prognosis of older patients with  
13 MVCAD undergoing PTCA. The present study will be focused on clinical and  
14 biochemical measures associated with the dysregulation of physiological processes  
15 that is observed during aging, which causes declining adaptive homeostasis, low-grade  
16 inflammation and oxidative stress.<sup>7 22</sup> Because we hypothesize that these measures  
17 are susceptible to change over time, clinical data linked to geriatric syndromes,  
18 comorbidities and MVCAD (e.g., patient health records and angiographic parameters)  
19 will be analyzed in combination with cardiovascular (e.g., cardiac T/I troponins, NT-  
20 proBNP, soluble ST2 and CKMB) metabolic (e.g., glucose, transaminases, lipoproteins  
21 and urea), inflammatory [i.e., cytokines (e.g., TNF- $\alpha$ , IL-1 $\beta$  and IL-6), chemokines (e.g.,  
22 IL-8/CXCL8, fractalkine/CX<sub>3</sub>CL1) and others (e.g., C-reactive protein)] and stress  
23 oxidative (e.g., GSH, GSSG, MDA, oxidized LDL and MPO) biomarkers.<sup>23-25</sup> Lastly,  
24 sexual dimorphism is common in the expression of these biomarkers, mainly in pro-  
25 inflammatory and oxidative stress biomarkers.  
26  
27  
28  
29  
30  
31  
32  
33  
34  
35  
36  
37  
38  
39  
40  
41  
42

43 This study aims to evaluate changes over time of a comprehensive range of  
44 sociodemographic/anthropometric, clinical and biochemical data from older patients  
45 with MVCAD treated with coronary revascularization through PTCA. Subsequently,  
46 relevant explanatory variables will be selected to develop a first predictive model based  
47 on MACE as primary outcome with the objective of establishing a reliable prognostic  
48 stratification for CR and ICR strategies.  
49  
50  
51  
52  
53  
54

55  
56  
57 There is no consensus on which revascularization strategy is more recommendable for  
58 older patients with MVCAD because of the lack of clinical trials addressing this  
59  
60

1  
2  
3 question. Given that a randomized controlled trial to compare outcomes of CR and ICR  
4 presents important ethical issues related to the random distribution of patients into one  
5 or another treatment group, an observational study will be of great utility to collect  
6 parameters and evaluate their validity in the prognosis of PTCA strategies in patients  
7 with MVCAD. Furthermore, a single-center study will allow that the decision-making  
8 procedures of clinicians are uniform.  
9  
10  
11  
12  
13  
14  
15  
16  
17  
18  
19  
20  
21  
22  
23  
24  
25  
26  
27  
28  
29  
30  
31  
32  
33  
34  
35  
36  
37  
38  
39  
40  
41  
42  
43  
44  
45  
46  
47  
48  
49  
50  
51  
52  
53  
54  
55  
56  
57  
58  
59  
60

For peer review only

## METHODS AND ANALYSIS

### 1 Study design

This prospective, observational, longitudinal study consists of three main in-person stages: 1) Patient recruitment during the first year; 2) six-month follow-up; and 3) twelve-month follow-up. Finally, an 18-month follow-up will conclude with a phone contact to assess health status using clinical questionnaires. Participants will finish the study after a MACE or the completion of follow-ups (primary endpoints). A schematic summary is shown in **Figure 1**.

### 2 Participants and eligibility criteria

#### 2.1 Participants

Eligible volunteers with MVCAD who will undergo a coronary revascularization will be recruited from the Department of Cardiovascular Surgery and Cardiology in the Hospital Universitario Virgen de la Victoria (Málaga, Spain). The first patient was included in June 2021.

#### 2.2 Eligibility criteria

1) Inclusion criteria: Men and women, 70 years and older (older adults) upon admission to the hospital, hospitalization for acute coronary syndrome (NSTEMI-ACS and STEMI-ACS), diagnosis of MVCAD (criteria:  $\geq 2$  coronary arteries with  $\geq 2.0$  mm segment diameter and  $\geq 70\%$  diameter stenosis), treatment with revascularization using PTCA, and signed informed consent.

2) Exclusion criteria: Life expectancy less than 1 year, refused informed consent, decisional impairment with no legally authorized representative, inability to complete

1  
2  
3 questionnaires or interviews, inability to contact for follow-up or non-English/non-  
4 Spanish speaking.  
5  
6

### 7 8 **3 Sample size and power calculation** 9

10  
11 The sample size was calculated using MACE as the primary outcome measures.  
12 Previous studies in older patients with MVCAD have revealed significant differences  
13 between CR and ICR groups in the primary outcome measures after a 12-month  
14 follow-up. Specifically, 20-30% of MACE in the ICR group and 5-10% of MACE in the  
15 CR group [i.e., Hazard ratio (HR)  $_{ICR/CR} = 3.3$ ].<sup>26-27</sup> In addition, dropout rates of 10-20%  
16 have been reported in prospective studies evaluating ischemic heart disease.<sup>28</sup>  
17  
18  
19

20  
21 Considering these preceding observations, the statistical parameters that were used to  
22 calculate the sample size for two independent groups (CR and ICR) were as follows:  
23 Type I error ( $\alpha$ ) = 0.05, power ( $1-\beta$ ) = 0.8 and hazard ratio (HR) = 3.3. The calculation  
24 revealed that the minimum number of participants for adequate study power was 138  
25 patients, which is concordant with the historical records of older adults admitted to our  
26 hospital with coronary artery disease. Therefore, we aim to ensure a sample size of  
27 150 older patients through the recruitment of 180 participants at the beginning of the  
28 study.  
29  
30  
31  
32  
33  
34  
35  
36  
37  
38  
39  
40  
41  
42  
43

### 44 **4 Data collection and variables** 45

46  
47 Relevant sociodemographic, anthropometric and clinical measures of the participants  
48 will be obtained through the electronic health records (DIRAYA, Servicio Andaluz de  
49 Salud - Junta de Andalucía). Clinical data related to geriatric syndromes (e.g., frailty),  
50 comorbidity, disability, MVCAD and revascularization (e.g., angiographic and  
51 electrocardiographic measures) will be obtained using questionnaires, interviews and  
52 cardiologic procedures. In addition, biochemical variables (e.g., inflammatory  
53  
54  
55  
56  
57  
58  
59  
60

1  
2  
3 biomarkers) will be obtained through different laboratory techniques such as selective  
4 enzyme-linked immunosorbent assay (ELISA) and multiplex immunoassays.  
5  
6  
7

#### 8 **4.1 Clinical questionnaires**

9

10  
11 Patients will complete various questionnaires and interviews at the baseline and follow-  
12 ups under supervision by trained and experienced staff:  
13  
14  
15

16  
17 The 5-item FRAIL scale (Fatigue, Resistance, Ambulation, Illness and Loss of weight)  
18 for frailty; Charlson Comorbidity Index predicts 10-year survival in patients with multiple  
19 comorbidities; the 10-item Barthel Index measures performance in activities of daily  
20 living; the Lawton-Brody scale measures instrumental activities of daily living; the 10-  
21 item AUDIT (Alcohol Use Disorders Identification test) for alcohol-related problems; the  
22 Pfeiffer SPMSQ (Short Portable Mental Status Questionnaire) for cognitive decline; the  
23 SF-36 (36-item Short Form survey) for quality of life related to health; the GRACE risk  
24 score (Global Registry of Acute Coronary Events) estimates admission-6 month  
25 mortality for patients with acute coronary syndrome; and the CRUSADE bleeding score  
26 (Can Rapid risk stratification of Unstable angina patients Suppress Adverse outcomes  
27 with Early implementation of the ACC/AHA guidelines) estimates major bleeding risk in  
28 patients with acute coronary syndrome.  
29  
30  
31  
32  
33  
34  
35  
36  
37  
38  
39  
40  
41  
42

#### 43 **4.2 Collection of blood samples**

44

45  
46 Blood extractions will be collected by experienced nurses at the baseline and follow-up  
47 stages. Venous blood will be extracted into two 10-mL K<sub>2</sub> EDTA tubes (BD, Franklin  
48 Lakes, NJ, USA) and centrifuged at 1,200xg for 10 minutes (4°C) to obtain plasma.  
49 Plasma samples will be aliquoted into 0.5 mL tubes and immediately encoded and  
50 stored at -80°C until biochemical determinations.  
51  
52  
53  
54  
55  
56  
57  
58  
59  
60



### 4.3 Variables

- *Sociodemographic and anthropometric variables* (e.g., age, ethnicity, sex, body mass, index, educational status, marital status, family size and socioeconomic status).

- *Clinical variables* [e.g., cardiovascular risks (e.g., arterial hypertension, dyslipidemia, smoking and chronic inflammatory diseases such as diabetes) and variables related to quality of life and geriatric syndromes (e.g., frailty, comorbidity, functional and cognitive disability, polypharmacy and use of psychoactive substances)

- *Cardiovascular variables related to MVCAD and revascularization* [e.g., acute coronary syndrome (STE-ACS and NSTE-ACS), revascularization (CR and ICR), electrocardiographic evolution (T waves, R-waves and ST-segment), ventricular ejection fraction, angiographic variables (e.g., diameters, stenosis), SYNTAX score for evaluating the complexity of coronary artery lesions (e.g., dominance, total occlusion, trifurcation, bifurcation, aorto-ostial lesion, severe tortuosity, length >20 mm, heavy calcification, thrombus and diffuse disease) and in-hospital and domiciliary care and pharmacological treatments.

- *Biochemical markers*: a) Cardiovascular [e.g., cardiac troponins (cTnT and cTnI), N-terminal prohormone of brain natriuretic peptide (NT-proBNP), soluble suppression of tumorigenicity (ST2) and creatine kinase MB isoenzym (CKMB)]; b) Metabolic (e.g., glucose, transaminases, lipoproteins and urea); c) Inflammatory [i.e., cytokines (e.g., TNF- $\alpha$ , IL-1 $\beta$  and IL-6), chemokines (e.g., IL-8/CXCL8, fractalkine/CX<sub>3</sub>CL1) and others (e.g., C-reactive protein)]; and stress oxidative [e.g., reduced and oxidized glutathione (GSH and GSSG), malondialdehyde (MDA), oxidized LDL and myeloperoxidase (MPO)] biomarkers.

#### 4.4 Primary outcome

The primary outcome measures will be a combination of MACE: heart failure, reinfarction, stroke, hospitalization for cardiovascular-related illness, unscheduled revascularization, and all-cause mortality. Otherwise, older patients will complete the study to the 18-month follow-up. Severe changes in the quality of life, geriatric syndromes and disability will be examined as secondary outcome measures.

#### 5 Statistical Analysis

Descriptive variables will be expressed as the number and percentage of subjects [n (%)], mean and standard deviation (mean  $\pm$  SD), or median and interquartile range [median (IQR)]. The significance of differences in categorical and continuous variables between the revascularization groups (CR and ICR) will be determined using the chi-square test and Student's t-test (normal distribution) or Mann-Whitney U test (non-normal distribution), respectively.

Correlation analyses between quantitative variables will be performed using the correlation coefficients of Pearson ( $r$ ) and Spearman ( $\rho$ ) with continuous and categorical variables, respectively to determine the association and dependency between explanatory variables.

Multivariate analyses such as analyses of covariance (ANCOVA) will be performed to evaluate the main effects and interaction of dependent categorical variables (e.g., revascularization strategy and occurrence of MACE) on explanatory variables (e.g., clinical and biochemical variables) while controlling covariates. Levene's test will be used to test the homoscedasticity of the independent explanatory variables and  $\log_{10}$ -transformation will be used for positively skewed distributions.

1  
2  
3 Cox proportional-hazards models and binary logistic regression models will be  
4 constructed with independent exploratory variables as predictors of primary and  
5 secondary outcomes and/or revascularization strategy. Receiver operating  
6 characteristics (ROC) analyses will be performed to evaluate the discriminative power  
7 of these regression models through the area under the curve (AUC). A final model will  
8 include the most predictive clinical and biochemical variables to distinguish older  
9 patients with CR and ICR. The identification of these predictive variables will help with  
10 the prognostic stratification of patients with MVCAD who need a PTCA.  
11  
12  
13  
14  
15  
16  
17  
18  
19  
20

21 All statistical analyses of the database will be performed using IBM SPSS Statistics  
22 version 24 (IBM, Armonk, NY, USA). A *p*-value <0.05 will be considered statistically  
23 significant.  
24  
25  
26  
27  
28  
29  
30  
31

## 32 CONCLUSION

33  
34  
35 In summary, there have been numerous studies focused on the establishment of a  
36 prognostic stratification of patients with ischemic heart disease who require angioplasty  
37 or percutaneous coronary revascularization. However, these studies are inconclusive  
38 because of different factors (e.g., very specific study samples, limited inclusion of  
39 parameters, and exclusion of older patients with health complications). This study  
40 focuses on the elderly population, whose demand for care is increasing rapidly in  
41 parallel to the life expectancy and the high prevalence of cardiovascular diseases. This  
42 research intends to identify, characterize and integrate metabolic, inflammatory and  
43 oxidative biomarkers with clinical and cardiovascular factors in older patients taking into  
44 account sex differences. This information will contribute to improving the prognostic  
45 stratification of patients diagnosed with MVCAD who need treatment with percutaneous  
46  
47  
48  
49  
50  
51  
52  
53  
54  
55  
56  
57  
58  
59  
60

1  
2  
3 CR or ICR. The ultimate goal of this study is contribute to improve the welfare and  
4 quality of life of older adults in modern society.  
5  
6  
7

## 8 **ETHICS AND DISSEMINATION**

9

### 10 **1 Ethics**

11  
12  
13  
14  
15 The study has been approved by the regional research ethics committee (the CEIm-  
16 Provincial de Málaga and the Portal de Ética de la Investigación Biomédica de  
17 Andalucía-PEIBA) (Id. PI0131/2020) in accordance with the Ethical Principles for  
18 Medical Research Involving Human Subjects adopted in the Declaration of Helsinki by  
19 the World Medical Association (64th WMA General Assembly, Fortaleza, Brazil,  
20 October 2013) and the Regulation (EU) 2016/679 of the European Parliament and of  
21 the Council 27 April 2016 on the protection of natural persons with regard to the  
22 processing of personal data and on the free movement of such data (General Data  
23 Protection Regulation). In Spain, the Law 41/2002 on regulating patient autonomy and  
24 rights and obligations regarding clinical information and documentation; and the  
25 Organic Law 3/2018 on the protection of personal data and guarantee of digital rights.  
26  
27 Written informed consents were obtained from each participant after a complete  
28 description of the study. All the participants will have the opportunity to discuss any  
29 questions or issues. All collected data and samples will be registered and stored with  
30 alphanumeric codes in order to maintain privacy and confidentiality.  
31  
32  
33  
34  
35  
36  
37  
38  
39  
40  
41  
42  
43  
44  
45  
46  
47

### 48 **2 Dissemination**

49  
50  
51 The proposed study is based on two issues that are of special interest to society, but  
52 also to the scientific community: Aging and Heart Disease. The results will be  
53 disseminated in international peer-reviewed journals, presented at conferences in  
54 Cardiology and Gerontology, and sent to participants, medical and health service  
55 managers, clinicians and other researchers. Additional activities will contribute to the  
56  
57  
58  
59  
60

1  
2  
3 divulgation of relevant results in social networks and education/research institution  
4  
5 websites [Universidad de Málaga (<https://www.uma.es>); CIBERCV  
6  
7 (<https://www.cibercv.es>); IBIMA (<http://www.ibima.eu>); and Hospital Universitario  
8  
9 Virgen de la Victoria (<http://www.huvv.es>).  
10  
11  
12  
13  
14  
15  
16  
17  
18  
19  
20  
21  
22  
23  
24  
25  
26  
27  
28  
29  
30  
31  
32  
33  
34  
35  
36  
37  
38  
39  
40  
41  
42  
43  
44  
45  
46  
47  
48  
49  
50  
51  
52  
53  
54  
55  
56  
57  
58  
59  
60

For peer review only

## CONTRIBUTORS

The study concept and design was conceived by FJPM and MJN. Patient recruitment process and collection of clinical data are performed by ADMCS, MVDA, VMBM, JRC and AIMR. Angiographic data are collected by FSP, MAG, LGR and LPM. Questionnaires and interviews are designed and applied by ADMC and MFL. Biochemical determinations in blood samples are performed by FJPM, MJSQ, DMV and REB. Statistical analyses are conducted by VMBM, JMMA, FJPM and MJN. ADMCS prepared the first draft of the manuscript. All authors critically read, edited and approved the final manuscript and approved the submitted version.

## FUNDING STATEMENT

This study has received funding from the following grants: PI-131/2020 funded by the Consejería de Salud y Familias - Junta de Andalucía and European Regional Development Funds/European Social Fund (ERDF/ESF); and UMA-20-FEDERJA-074 funded by the Universidad de Málaga, Consejería de Economía, Conocimiento, Empresas y Universidad - Junta de Andalucía and ERDF/ESF. This study is also supported by the Servicio Andaluz de Salud (Consejería de Salud y Familias-Junta de Andalucía) and the Fundación Andaluza de Cardiología.

## ACKNOWLEDGMENTS

This study has received support for the statistical approaches from the Cátedra de Terapias Avanzadas en Patología Cardiovascular (The subject of Advanced Therapies in Cardiovascular Pathologies. CIF Q-2918001-E) of the Universidad de Málaga. We thank José Herrera Jiménez for his help in the biochemical determinations.

## COMPETING INTERESTS

The authors declare no conflict of interest.

1  
2  
3 **PATIENT AND PUBLIC INVOLVEMENT**  
4

5  
6 Neither patients nor the public were involved in the design, conduct, reporting, or  
7  
8 dissemination plans of our research.  
9

10  
11  
12  
13  
14  
15  
16  
17  
18  
19  
20  
21  
22  
23  
24  
25  
26  
27  
28  
29  
30  
31  
32  
33  
34  
35  
36  
37  
38  
39  
40  
41  
42  
43  
44  
45  
46  
47  
48  
49  
50  
51  
52  
53  
54  
55  
56  
57  
58  
59  
60

For peer review only

## REFERENCES

1. World Health Organization. WHO Global Health Estimates. Leading causes of death and disability 2000-2019. Available from: <https://www.who.int/data/global-health-estimates>; Updated 2020 dec ; cited 2021 Aug 7.
2. Instituto Nacional de Estadística. Madrid. Available from: [https://www.inec.es/dyngs/INEbase/es/categoriahtm?c=Estadistica\\_P&cid=1254734710984](https://www.inec.es/dyngs/INEbase/es/categoriahtm?c=Estadistica_P&cid=1254734710984) 2020; Updated 2020 Jan 1; cited 2021 Jun 9.
3. Murad K, Kitzman DW. Frailty and multiple comorbidities in the elderly patient with heart failure: implications for management. *Heart Fail Rev* 2012;**17**(4-5):581-8.
4. Madhavan MV, Gersh BJ, Alexander KP, et al. Coronary Artery Disease in Patients  $\geq 80$  Years of Age. *J Am Coll Cardiol* 2018;**71**(18):2015-40.
5. Inouye SK, Studenski S, Tinetti ME, et al. Geriatric syndromes: clinical, research, and policy implications of a core geriatric concept. *J Am Geriatr Soc* 2007;**55**(5):780-91.
6. Schottker B, Saum KU, Jansen EH, et al. Associations of metabolic, inflammatory and oxidative stress markers with total morbidity and multi-morbidity in a large cohort of older German adults. *Age Ageing* 2016;**45**(1):127-35.
7. Wu J, Xia S, Kalionis B, et al. The role of oxidative stress and inflammation in cardiovascular aging. *Biomed Res Int* 2014;**2014**:615312.
8. Steven S, Frenis K, Oelze M, et al. Vascular Inflammation and Oxidative Stress: Major Triggers for Cardiovascular Disease. *Oxid Med Cell Longev* 2019;**2019**:7092151.
9. Dai X, Busby-Whitehead J, Alexander KP. Acute coronary syndrome in the older adults. *J Geriatr Cardiol* 2016;**13**(2):101-8.
10. Hwang SY, Park EH, Shin ES, et al. Comparison of factors associated with atypical symptoms in younger and older patients with acute coronary syndromes. *J Korean Med Sci* 2009;**24**(5):789-94.



- 1  
2  
3 11. Tavares CAM, Samesima N, Lazar Neto F, et al. Usefulness of ECG criteria to rule  
4  
5 out left ventricular hypertrophy in older individuals with true left bundle branch  
6  
7 block: an observational study. *BMC Cardiovasc Disord* 2021;**21**(1):547.  
8
- 9 12. Zannad F, Huvelle E, Dickstein K, et al. Left bundle branch block as a risk factor for  
10  
11 progression to heart failure. *Eur J Heart Fail* 2007;**9**(1):7-14.  
12
- 13 13. Wang TY, McCoy LA, Bhatt DL, et al. Multivessel vs culprit-only percutaneous  
14  
15 coronary intervention among patients 65 years or older with acute myocardial  
16  
17 infarction. *Am Heart J* 2016;**172**:9-18.  
18
- 19 14. Cano-Garcia M, Millan-Gomez M, Sanchez-Gonzalez C, et al. Impact of  
20  
21 Percutaneous Coronary Revascularization of Severe Coronary Lesions on  
22  
23 Secondary Branches. *Rev Esp Cardiol (Engl Ed)* 2019;**72**(6):456-65.  
24
- 25 15. Gaba P, Gersh BJ, Ali ZA, et al. Complete versus incomplete coronary  
26  
27 revascularization: definitions, assessment and outcomes. *Nat Rev Cardiol*  
28  
29 2021;**18**(3):155-68.  
30  
31
- 32 16. Zimarino M, Calafiore AM, De Caterina R. Complete myocardial revascularization:  
33  
34 between myth and reality. *Eur Heart J* 2005;**26**(18):1824-30.  
35
- 36 17. Shannon J, Colombo A. Revascularization in multivessel CAD: a functional  
37  
38 approach. *Nat Rev Cardiol* 2012;**9**(4):243-52.  
39
- 40 18. Nagaraja V, Ooi SY, Nolan J, et al. Impact of Incomplete Percutaneous  
41  
42 Revascularization in Patients With Multivessel Coronary Artery Disease: A  
43  
44 Systematic Review and Meta-Analysis. *J Am Heart Assoc* 2016;**5**(12).  
45
- 46 19. Sanchis J, Garcia Acuna JM, Raposeiras S, et al. Comorbidity burden and  
47  
48 revascularization benefit in elderly patients with acute coronary syndrome. *Rev*  
49  
50 *Esp Cardiol (Engl Ed)* 2021;**74**(9):765-72.  
51
- 52 20. Girerd N, Magne J, Rabilloud M, et al. The impact of complete revascularization on  
53  
54 long-term survival is strongly dependent on age. *Ann Thorac Surg*  
55  
56 2012;**94**(4):1166-72.  
57  
58  
59  
60

- 1  
2  
3 21. Ando T, Takagi H, Grines CL. Complete versus incomplete revascularization with  
4 drug-eluting stents for multi-vessel disease in stable, unstable angina or non-  
5 ST-segment elevation myocardial infarction: A meta-analysis. *J Interv Cardiol*  
6 2017;**30**(4):309-17.  
7  
8  
9  
10  
11 22. Pomatto LCD, Davies KJA. The role of declining adaptive homeostasis in ageing. *J*  
12 *Physiol* 2017;**595**(24):7275-309.  
13  
14  
15 23. Liguori I, Russo G, Curcio F, et al. Oxidative stress, aging, and diseases. *Clin Interv*  
16 *Aging* 2018;**13**:757-72.  
17  
18  
19 24. Dhingra R, Vasan RS. Biomarkers in cardiovascular disease: Statistical  
20 assessment and section on key novel heart failure biomarkers. *Trends*  
21 *Cardiovasc Med* 2017;**27**(2):123-33.  
22  
23  
24 25. Soysal P, Stubbs B, Lucato P, et al. Inflammation and frailty in the elderly: A  
25 systematic review and meta-analysis. *Ageing Res Rev* 2016;**31**:1-8.  
26  
27  
28 26. Harada M, Miura T, Kobayashi T, et al. Clinical impact of complete  
29 revascularization in elderly patients with multi-vessel coronary artery disease  
30 undergoing percutaneous coronary intervention: A sub-analysis of the  
31 SHINANO registry. *Int J Cardiol* 2017;**230**:413-19.  
32  
33  
34 27. Berezhnoi K, Kokov L, Vanyukov A. Effects of complete revascularization on long-  
35 term treatment outcomes in patients with multivessel coronary artery disease  
36 over 80 years of age admitted for acute coronary syndrome. *Cardiovasc Diagn*  
37 *Ther* 2019;**9**(4):301-09.  
38  
39  
40 28. Stocks NP, Broadbent JL, Lorimer MF, et al. The Heart Health Study - increasing  
41 cardiovascular risk assessment in family practice for first degree relatives of  
42 patients with premature ischaemic heart disease: a randomised controlled trial.  
43 *BMC Fam Pract* 2015;**16**:116.  
44  
45  
46  
47  
48  
49  
50  
51  
52  
53  
54  
55  
56  
57  
58  
59  
60

**FIGURE LEGEND**

**Figure 1.** Schematic representation of the study design. Abbreviations: MVCAD = multivessel coronary artery disease; PTCA = percutaneous transluminal coronary angioplasty; CR = complete revascularization; ICR = incomplete revascularization.

For peer review only

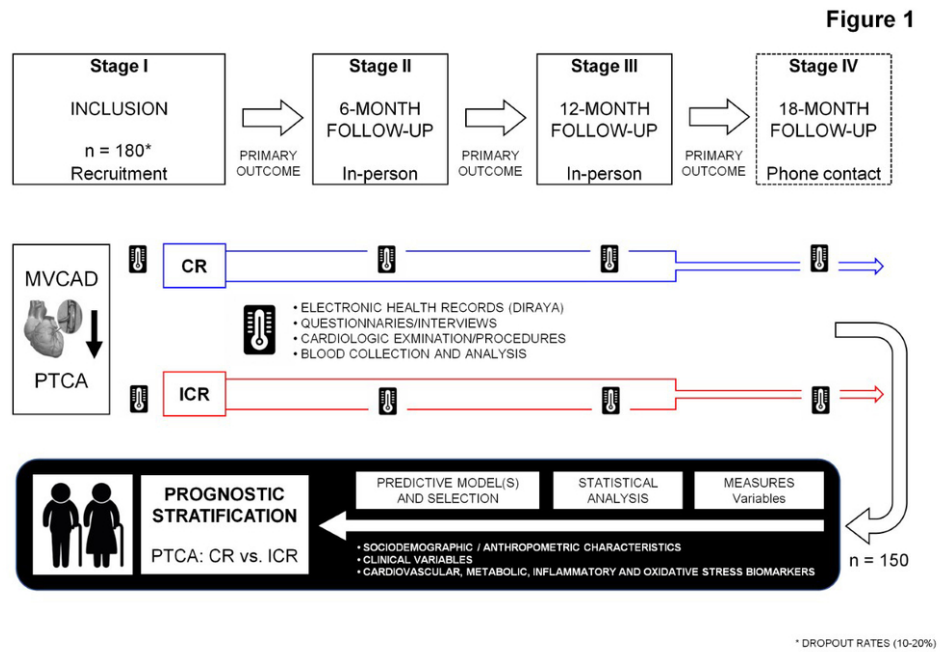

Figure 1. Schematic representation of the study design. Abbreviations: MVCAD = multivessel coronary artery disease; PTCA = percutaneous transluminal coronary angioplasty; CR = complete revascularization; ICR = incomplete revascularization.

87x60mm (300 x 300 DPI)
